# Supplementary material
Source: Springer Nature journal article supplement (https://www.springermedizin.de/resource/supplementary/13022_2009_31_MOESM4_ESM.pdf/9641332)

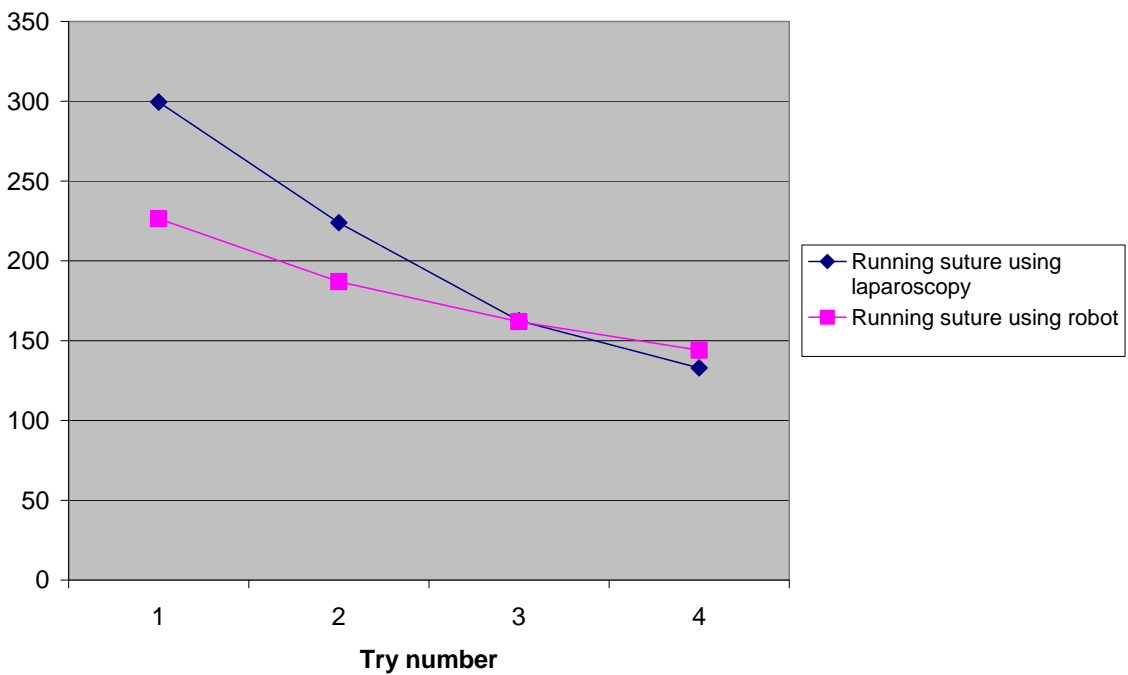

Supplement: MOESM4 [file 9641332]
